# Supplementary material for: From dinosaurs to birds: a tail of evolution
Source: EvoDevo. 2014 Jul 29;5:25. doi: 10.1186/2041-9139-5-25 (PMC4304130; doi:10.1186/2041-9139-5-25)
Supplement: Additional file 3 — Table of posterior vertebral body fusion mouse mutants. [file 2041-9139-5-25-S3.pdf]

### Additional file 3. Posterior Vertebral Body Fusion Mouse Mutants

| Mutant                                                                           | Affected Vertebrae | Dec. #<br>cdl v | Fused Ribs | Fused Digits | Dev. Structure Affected |        |         | Viable | Fertile | Relevant Functions and Pathways                                                          |
|----------------------------------------------------------------------------------|--------------------|-----------------|------------|--------------|-------------------------|--------|---------|--------|---------|------------------------------------------------------------------------------------------|
|                                                                                  |                    |                 |            |              | Somite                  | N.Tube | N-chord |        |         |                                                                                          |
| <i>am amputated</i><br>possible mutation: <i>Foxc2</i><br>Spontaneous, recessive | data not shown     | +++             | ✓          |              | ✓                       |        |         | —      |         | <i>Foxc2</i> is involved in somite formation; tied to <i>Shh</i> & <i>Bmp</i> [1]        |
| <i>Ankrd13a</i><br>Gene trapped                                                  | cdl                |                 |            |              |                         |        |         | ✓      | ✓       | cell-cell adhesion, also involved in neural crest [2]                                    |
| <i>Arntl</i> ( <i>Bmal1</i> or <i>MOP3</i> )<br>Targeted knock-out               | T, S               |                 |            |              |                         |        |         | ✓*     | ✓       | circadian clock gene tied to Notch-reg. angiogenesis [3]                                 |
| <i>Bmp7</i><br>Random gene disruption by insertion                               | T                  |                 | ✓          |              |                         |        |         | —      |         | specifies ventroposterior fates and paraxial mesoderm [4]                                |
| <i>Cdx2</i> <sup>+/-</sup> / <i>Cdx4</i> <sup>-/-</sup><br>Targeted knock-outs   | S                  | +++             |            |              | ✓                       | ✓      |         | ✓      | ✓       | Hox pathway genes involved in posterior axial elongation; tied to Wnt and <i>Fgf</i> [5] |
| <i>Cenpj</i><br>Targeted insertion                                               | cdl                |                 |            | ✓            |                         |        |         | ✓      | ✓       | involved in centriole biogenesis & chrom. stability [6]                                  |
| <i>CREB</i><br>Dominant negative knock-in                                        | C, T, L, cdl       |                 | ✓          |              | ✓                       |        |         | —      |         | Modulator of Notch/Wnt in somite segmentation & polarity establishment [7]               |
| <i>Dkk1</i> <sup>d/-</sup><br>doubleridge/null compound                          | L, S, cdl          |                 |            | ✓            | ✓                       |        |         | ✓      | ✓       | Lrp6 binding partner; modulates Wnt expression [8]                                       |
| <i>Dll3</i><br>Spontaneous or radiation-induced; recessive                       | C, T, L, S, cdl    | ++              | ✓          |              | ✓                       |        |         | ✓      | ✓       | Notch/Wnt crosstalk during somitogenesis [9]                                             |
| <i>Fgf3</i><br>Targeted knock-out                                                | cdl                | ++              |            |              | ✓                       | ✓      |         | ✓*     | ✓       | Upstream modulator of Notch/Wnt during somite polarity establishment [10]                |
| <i>Fkbp8</i><br>Gene trapped                                                     | T, L, S            |                 |            |              |                         | ✓      |         | ✓      | ✓       | Neural tube patterning; tied to Notch via <i>Zic1</i> down-reg. [11]                     |

|                                                                |                                |                |   |   |   |   |   |    |   |                                                                                                |
|----------------------------------------------------------------|--------------------------------|----------------|---|---|---|---|---|----|---|------------------------------------------------------------------------------------------------|
| <i>Gnai3</i><br>Targeted knock-out                             | L                              | data not shown | ✓ |   | ✓ |   |   | ✓  | ✓ | tied to Bmp7, and Wnt/axin signaling [12]                                                      |
| <i>Hes7</i><br>Targeted insertion knock-in                     | C, T, L, S, cdl                | ++             | ✓ |   | ✓ |   |   | ✓* | ✓ | Notch/Fgf crosstalk in somite segmentation clock [13]                                          |
| <i>Ikka</i><br>Targeted reporter insertion                     | C, S, cdl                      | +              |   | ✓ |   |   |   | —  |   | involved in epidermal cell adhesion; facilitates bone formation via bFGF [14]                  |
| <i>Jsr</i> jumbled spine & ribs<br>Spontaneous, dominant       | T, cdl                         | ++             | ✓ |   | ✓ |   |   | ✓  | ✓ | mutation unknown; tied to Notch pathway via Uncx [15]                                          |
| <i>Knk</i> kinked tail<br>Spontaneous, semi-dominant           | cdl                            | +              |   |   |   |   | ✓ | ✓  | ✓ | mutation unknown [16]                                                                          |
| <i>Lfng</i><br>Chemically induced single point mutation        | T, L, S                        | ++             | ✓ |   | ✓ |   |   | ✓* | ✓ | Notch pathway; involved in somite segmentation clock [17]                                      |
| <i>Lrp6</i><br>Spontaneous, semi-dominant                      | cdl                            | ++             | ✓ |   | ✓ | ✓ |   | ✓* | ✓ | Wnt/Notch crosstalk in somite segmentation [18]                                                |
| <i>mea</i> meander tail<br>Spontaneous, recessive              | T, L, cdl + S vertebral spines | ++             |   |   |   |   |   | ✓  | ✓ | mutation unknown [19]                                                                          |
| <i>Meox1/Meox2</i><br>Targeted knock-outs                      | cdl                            | ++             | ✓ |   | ✓ |   |   | —  |   | involved in somite patterning; induced by retinoic acid [20]                                   |
| <i>Mesp2</i><br>Targeted insertion knock-out                   | C; L transverse process fusion | ++             |   |   | ✓ |   |   | ✓* | ✓ | Notch pathway; involved in somite boundary formation [21]                                      |
| <i>N-myc</i><br>alternative splice conditional mutation        | L                              |                |   |   |   |   | ✓ | ✓  | ✓ | promotes neurogenesis via N-myc/Dll3/Notch cascade [22]                                        |
| <i>Noto</i><br>Spontaneous single point mutation, recessive    | L, S, cdl                      | ++             |   |   | ✓ | ✓ | ✓ | ✓  | ✓ | involved in notochord extension & node; controlled by Wnt [23]                                 |
| <i>Nrarp</i><br>Targeted knock-out                             | T, L, S, cdl                   | +              | ✓ |   | ✓ |   |   | ✓  | ✓ | Notch/Wnt crosstalk in somite segmentation clock [24]                                          |
| <i>Pax3</i> splotch <sup>d</sup><br>Spontaneous, semi-dominant | C, T, L, S                     |                | ✓ |   | ✓ | ✓ |   | —  |   | involved in preaxial mesoderm condensation for somitogenesis; tied to Notch pathway genes [25] |
| <i>Plxnd1</i><br>Targeted knock-out                            | T, L                           | data not shown | ✓ |   |   |   |   | —  |   | Notch-controlled role in inter-somitic vascular development [26]                               |

|                                                                                    |                                           |     |   |   |   |   |   |    |    |                                                                                                                               |
|------------------------------------------------------------------------------------|-------------------------------------------|-----|---|---|---|---|---|----|----|-------------------------------------------------------------------------------------------------------------------------------|
| <i>Ppp5c</i><br>Targeted insertion                                                 | cdl                                       |     |   |   |   |   |   | ✓  | ✓  | regulates ERK signaling [27];<br>ERK signaling is involved in<br>Wnt/FGF controlled somite<br>segmentation [28]               |
| <i>rh</i> rachiterata<br>Spontaneous, recessive                                    | L, S                                      | +   | ✓ |   | ✓ |   |   | ✓  | ✓  | mutation unknown; tied to<br>Shh via Pax1 [25]                                                                                |
| <i>Ror2</i><br>Targeted insertion knock-in                                         | cdl                                       | +   | ✓ | ✓ | ✓ |   |   | ✓  | ✓  | Wnt Rc; involved in<br>maintenance of presomitic<br>mesoderm; also tied to<br>Notch via Dll1, Lfng, &<br>Mesp2 down-reg. [29] |
| <i>Rpl38</i><br>Spontaneous, semi-dominant                                         | C, T, cdl                                 | ++  | ✓ |   |   | ✓ |   | ✓* | ✓  | ribosomal protein involved<br>in Hox gene control [30]                                                                        |
| <i>Rps7</i><br>Chemically induced single<br>point mutation, dominant               | cdl; S<br>transverse<br>process fusion    | +   |   |   |   |   |   | ✓* | ✓  | ribosomal protein; role in<br>posterior dev. not studied<br>[31]                                                              |
| <i>Sfxn1</i> f, flexed tail<br>Spontaneous, recessive                              | L, S, cdl                                 | +/- | ✓ |   |   | ✓ | ✓ | ✓  | ✓  | Smad5/Bmp4 signaling<br>defects [32]                                                                                          |
| <i>Sulf1/Sulf2</i><br>Targeted insertion knock-<br>outs                            | T, L, S, cdl                              |     |   |   | ✓ |   |   | ✓  | ✓  | regulate growth factors;<br>tied to Bmp & Shh signaling<br>[33]                                                               |
| <i>Tbx6</i><br>Spontaneous, duplication/<br>insertion                              | C; T, L trans-<br>verse process<br>fusion | +   | ✓ |   | ✓ | ✓ | ✓ | ✓  | ✓* | Notch-controlled role in<br>somite boundary formation<br>[34]                                                                 |
| <i>Uncx</i><br>Targeted reporter insertion                                         | data not shown                            |     | ✓ |   | ✓ |   |   | —  |    | Notch signaling modulator<br>in somite condensation and<br>differentiation [35]                                               |
| <i>Vangl2</i> (homozygote)<br>Spontaneous, single point<br>mutation, semi-dominant | T, L, S, cdl                              | ++  | ✓ |   |   | ✓ |   | —  |    | involved in convergent<br>extension & cell polarity;<br>tied to Wnt [36]                                                      |
| <i>Wnt5a</i><br>Targeted insertion knock-out                                       | S, cdl                                    | +++ |   |   | ✓ | ✓ |   | —  |    | Wnt secreted by the VER<br>[37]; strain-dep. vertebral<br>fusion & viability defects                                          |
